# Supplementary material
Source: publisher figshare collection journal article supplement (https://sage.figshare.com/ndownloader/files/17855357)
Supplement: Supplementary file 1 [file 17855357]

## Appendix 1 – List of interviewees and the interview guide

This list is only for purposes of research administration and review to protect the confidentiality of interviewees. In the paper, interviewees from the data-governing institutions were referred not by their organisation, but this group name to protect their anonymity. Members of the legislative working group belong to a variety of organisations, and their background is not disclosed.

|    | <b>Position</b> | <b>Affiliation</b>                        | <b>Interviewee category in the paper</b> | <b>Gender</b> | <b>Date</b> | <b>Length in minutes</b> | <b>Additional information</b> |
|----|-----------------|-------------------------------------------|------------------------------------------|---------------|-------------|--------------------------|-------------------------------|
| 1  | Senior manager  | Finnish Social Insurance Institution KELA | Data governing institution               | Female        | 13.6.2018   | 55                       |                               |
| 2  | Senior manager  | Finnish Social Insurance Institution KELA | Data governing institution               | Male          | 5.6.2018    | 62                       |                               |
| 3  | Member          | Legislative working group                 | Legislative working group                | Female        | 12.6.2018   | 66                       | Skype-interview               |
| 4  | Member          | Legislative working group                 | Legislative working group                | Female        | 4.6.2018    | 66                       | Skype-interview               |
| 5  | Member          | Legislative working group                 | Legislative working group                | Male          | 8.6.2018    | 79                       |                               |
| 6  | Member          | Legislative working group                 | Legislative working group                | Female        | 5.6.2018    | 77                       |                               |
| 7  | Civil servant   | Ministry of Social Affairs and Health     | Ministry of Social Affairs and Health    | Male          | 7.6.2018    | 92                       |                               |
| 8  | Civil servant   | Ministry of Social Affairs and Health     | Ministry of Social Affairs and Health    | Female        | 13.6.2018   | 69                       |                               |
| 9  | Civil servant   | Ministry of Social Affairs and Health     | Ministry of Social Affairs and Health    | Male          | 7.6.2018    | 60                       |                               |
| 10 | Manager         | National Institute for Health and Welfare | Data governing institutions              | Male          | 4.6.2018    | 61                       |                               |

|    |                   |                                           |                             |        |           |    |                 |
|----|-------------------|-------------------------------------------|-----------------------------|--------|-----------|----|-----------------|
| 11 | Technical manager | National Institute for Health and Welfare | Data governing institutions | Female | 6.6.2018  | 56 |                 |
| 12 | Manager           | Sitra                                     | Sitra                       | Female | 14.6.2018 | 67 |                 |
| 13 | Technical manager | Sitra                                     | Sitra                       | Male   | 14.6.2018 | 75 |                 |
| 14 | Technical manager | Statistics Finland                        | Data governing institutions | Female | 11.6.2018 | 57 |                 |
| 15 | Senior manager    | Statistics Finland                        | Data governing institutions | Male   | 12.6.2018 | 76 |                 |
| 16 | Technical manager | Statistics Finland                        | Data governing institutions | Male   | 11.6.2018 | 72 |                 |
| 17 | Technical manager | University Hospital of Turku              | Data governing institutions | Male   | 8.6.2018  | 56 | Skype-interview |

## Interview Guide

This guide has been translated from the original in Finnish. The interview guide was given to the interviewees at the start of the interview, or in advance if requested. The investigator used an expanded version of the guide, in which each question was accompanied by one to three probes. In section 3, only the part that the interviewee felt more comfortable to answer will be covered, and this was decided at the start of the interview.

### 1. Start

1. How would you describe your role in the project?

2. Tell in brief how the project got started for you?

## **2. Work of your own organisation and collaboration with others**

3. How would you describe the goals and needs of your organisation in this project?

4. What kind of similar projects has your organisation had before?

5. In this project, who are your most important collaborators?

6. What kind of goals and needs do the other participating actors have?

7. How do these goals surface in the collaboration with these actors?

8. How would you describe the Finnish collaboration with social and health data in general terms?

## **3. Progress of the project – Only section 1 or 2 will be covered**

### **1. Expert working group and legislation**

9. What are your experiences from the expert legislative working group?

10. How well do the proposals of the project at the moment align with the goals and needs of your organisation?

11. How did the different perspectives of the actors participating in drafting the legislation surface?
12. How has the collaboration and negotiation with different actors fared?
13. How do you see the role of the Ministry of Social and Welfare Affairs and SITRA in the coordination of the project?
14. How do you see the collaboration between the working group and the ISAACUS-project?

## **2. ISAACUS and the pre-production projects**

9. How does your subproject support the goals of the overall project framework?
10. How would you describe the connection of the project to other ICT development?
11. What do you know about the other parts of the ISAACUS-projects, and how does your subproject relate to them?
12. How well do the work and proposals of the ISAACUS-project align with the goals and needs of your organisation?
13. How has the collaboration between different actors fared?
14. How do you see the role of the Ministry of Social and Welfare Affairs and SITRA in the pre-production projects?
15. How do you see the collaboration between the ISAACUS-project and its sub-projects, and the legislative drafting?

#### **4. Challenges**

16. What kind of challenges or barriers have you encountered during the project?

17. Have these challenges been solved?

18. How have they changed during the course of the project?

19. Do you see that the project has had breakthrough moment when things moved forward quickly? How would you describe them?

20. Has there been identified any practical challenges, which are known to be encountered later, but that have yet been dealt with?

21. Can you think of other things, that might develop into challenges in the future?

#### **5. Ending**

23. How do you see the future of the project?

24. Do you see that your organisations relationship with data will change in the future?
